# Supplementary material for: Data integration and predictive modeling methods for multi-omics datasets
Source: Royal Society of Chemistry journal article supplement (doi:10.1039/c7mo00051k), 2017-12-20
Supplement: c7mo00051k2.xlsx [file c7mo00051k2.xlsx]

## Sheet: Table S1
Output	Specific Problem	Average AUC	Problem Category	Species	Input	AUC	PMID	Year	Method	Note
Phenome	Colon cancer	0.681	Phenotype prediction	Human	Metabolome	0.692;0.670	28640228	2017	Regression
Phenome	Hepatocellular carcinoma	0.95	Phenotype prediction	Human	Metabolome	1.0;0.984;0.906	26658617	2015	Ensemble
Phenome	Post-stroke depression	0.954	Phenotype prediction	Human	Metabolome	0.954	27536114	2016	Regression
Phenome	Lung cancer	0.65	Phenotype prediction	Human	Metabolome	0.65	25944812	2015	Neural Network
Phenome	Ovarian cancer	1	Phenotype prediction	Human	Proteome	1	26611346	2015	KNN
Phenome	Prostate cancer	0.81	Phenotype prediction	Human	Proteome	0.81	26611346	2015	KNN
Phenome	Pancreatic cancer	0.58	Phenotype prediction	Human	Proteome	0.58	26611346	2015	KNN
Phenome	Celiac disease	0.86	Phenotype prediction	Human	Genome (SNP)	0.86	24963154	2014	Regression
Phenome	Crohn's disease	0.68	Phenotype prediction	Human	Genome (SNP)	0.68	24963154	2014	Regression
Phenome	Ulcerative Colitis	0.66	Phenotype prediction	Human	Genome (SNP)	0.66	24963154	2014	Regression
Phenome	Type 1 diabetes	0.88	Phenotype prediction	Human	Genome (SNP)	0.88	20842684	2010	Regression
Phenome	Parkinson disease	0.56	Phenotype prediction	Human	Genome (SNP)	0.56	22777693	2012	SVM
Phenome	Inflammatory arthritis	0.635	Phenotype prediction	Human	Genome (SNP)	0.635	24917882	2014	Naïve Bayes
Phenome	Pathogenic variant	0.95	Microbial phenotype	Bacteria	Genome	0.95	25338716	2015	Neural Network	Deep learning
Epigenome	Epigenetic signature	0.89	Epigenetic signature	Human	Genome	0.958;0.923;0.856	26301843	2015	Neural Network	Deep learning
Epigenome	Methylated CpG	0.89	Methylated CpG	Human	Genome,Epigenome	0.89	http://biorxiv.org/content/early/2017/02/01/055715	2017	Neural Network	Deep learning
Interactome	DNA/Protein-binding affinity	0.79	DNA/Protein-binding affinity	Human	Genome	0.85;0.90;0.71;0.85	26213851	2015	Neural Network	Deep learning
Interactome	Protein-protein interaction	0.97	Protein-protein interaction	Human	Proteome	0.97	27112932	2016	KNN*	Variant of KNN
Interactome	Gene-gene interaction	0.75	Gene-gene interaction	Human	Genome,Transcriptome	0.75	25933428	2015	Ensemble
Interactome	Gene-regulatory network	0.83	Gene-regulatory network	Bacteria	Transcriptome	0.83	23698722	2014	SVM
Interactome	Metabolic pathway	0.95	Metabolic pathway	Bacteria	Genome	0.95	20064214	2010	Ensemble
Proteome	Glycosylation site	0.98	Post-translational modification site	Eukaryotes	Proteome (sequence)	0.98	17996106	2007	Ensemble
Proteome	Protein function	0.66	Protein function	Multiple	Proteome	0.66	23353650	2013	Ensemble
Proteome	Subcellular localization	0.94	Subcellular localization	Eukaryotes	Proteome	0.94	18836191	2008	KNN
Metabolome	Classification	0.795	Classification	Human	Metabolome	0.75;0.84	17142559	2007	SVM*	Problem that can be formulated as SVM
Genome	Prediction of essential genes	0.78	Prediction of essential genes	Bacteria	Genome,Transcriptome	0.75;0.81	20438628	2010	SVM
Transcriptome	pre-mRNA splicing	0.97	pre-mRNA splicing	Human	Genome	0.97	25416802	2014	Ensemble
Transcriptome	Gene expression	0.83	Gene expression	Human	Epigenome	0.83	25861082	2015	Ensemble
